# Supplementary material for: Cell Synchronization Enhances Nuclear Transformation and Genome Editing via Cas9 Enabling Homologous Recombination in Chlamydomonas reinhardtii
Source: PubMed Central journal article supplement (PMC8011982; doi:10.1021/acssynbio.0c00390), 2020-09-11
Supplement: sb0c00390_si_001.pdf [file sb0c00390_si_001.pdf]

## **Supporting Information**

**Title:** Cell synchronization enhances nuclear transformation and genome editing via Cas9 enabling Homologous Recombination in *Chlamydomonas reinhardtii*

**Authors:** Max Angstenberger, Francesco de Signori, Valeria Vecchi, Luca Dall'Osto and Roberto Bassi

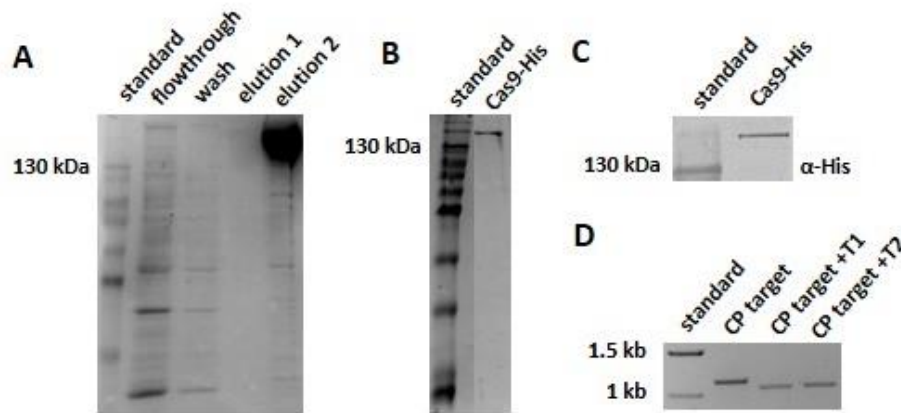

**Figure S1.** Result of expression and purification of nuclease Cas9 from *E. coli*. (A) SDS-PAGE analysis after expression and purification of recombinant Cas9-His in *E. coli*, carried out on eluted fractions from Ni-affinity chromatography. (B) SDS-PAGE analysis of Cas9-His after EDTA treatment, washing and concentration by centricons. (C) Immunoblot using an  $\alpha$ -His antibody for detection of Cas9-His. (D) *In vitro* restriction assay using Cas9-His, amplified and purified target DNA of *cpftsY* (CP target, see Fig. 3: CP\_fw/CP\_rv) and sgRNA for target T1 and T2.

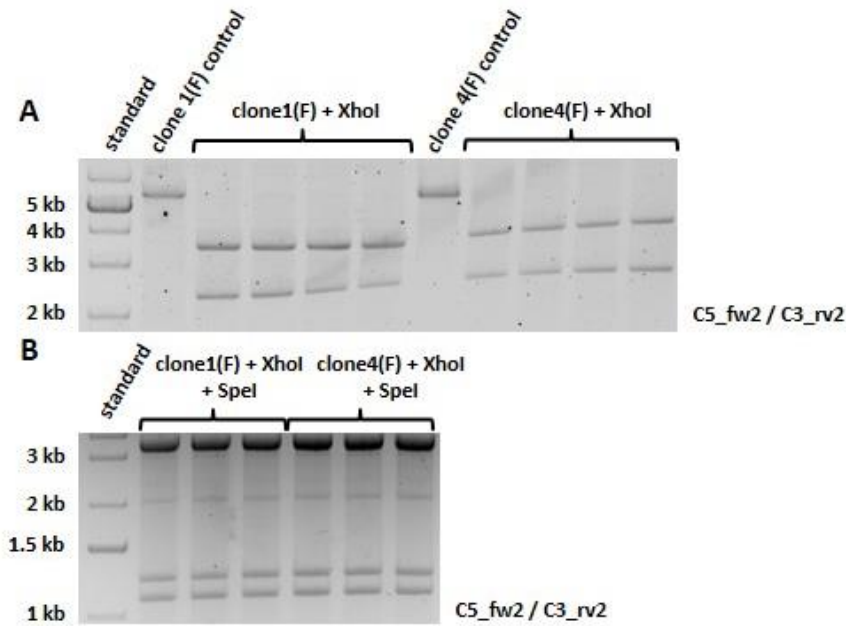

**Fig. S2 Agarose gels showing restriction analysis of *cpftsY* knock-in amplification products.** After amplification of the recombinant *cpftsY* sequence containing the desired knock-in of the *aph7* cassette using the primers C5\_fw2 and C3\_rv2 (see Fig. 3, 6), in one reaction for clones 1F and 4F (A), one part was loaded as a control (5.8 kb), while the rest was digested with XhoI and loaded onto 4 lanes, leading to the restricted fragments of 2.3 kb and 3.5 kb as expected. In a second reaction, also using SpeI (Fig. 6), the fragment of 2.3 kb was further digested into one fragment of 1.1 kb and another of 1.2 kb. Fragments of 3.5 kb, 1.2 kb and 1.1 kb were purified by gel extraction and cloned into the bluescript vector KS- for sequencing, which confirmed the occurrence of sequence-specific knock-in, as shown in Fig. 6F.

**Table S1 Transformation procedure overview.** Shown are the original and optimized transformation protocols for *C. r.* CW15 used in this study, showing an overall optimization and an especially marked reduction of the necessary compounds due to the use of synchronized cell cultures with a very high transformation efficiency.

|                                                                         | <b>Original protocol<br/>unsynchronized cells<br/>[based on Shimogawara<br/><i>et al.</i>, 1998<sup>4</sup>]</b> | <b>Optimized protocol<br/>unsynchronized<br/>cells</b> | <b>Optimized protocol<br/>synchronized cells</b> |
|-------------------------------------------------------------------------|------------------------------------------------------------------------------------------------------------------|--------------------------------------------------------|--------------------------------------------------|
| <b>Light / Temperature</b>                                              | 24 °C; 16 h light, 8 h<br>darkness                                                                               | 24 °C; 16 h light, 8 h<br>darkness                     | 28°C 12 h light; 18<br>°C 12 h darkness          |
| <b>Doubling time</b>                                                    | 8 - 10 h                                                                                                         | 8 - 10 h                                               | 24h                                              |
| <b>Transformation culture</b>                                           | 0.5 x 10 <sup>6</sup> cells/ml; 3-4<br>days                                                                      | 10 <sup>5</sup> cells/ml; 3 days                       | 10 <sup>5</sup> cells/ml; 3 days                 |
| <b>Cells / transformation</b>                                           | 5 x 10 <sup>7</sup>                                                                                              | 5 x 10 <sup>6</sup>                                    | 10 <sup>6</sup>                                  |
| <b>Linearized DNA</b>                                                   | 1 µg                                                                                                             | 250 ng                                                 | 60 – 400 ng                                      |
| <b>Transformation volume</b>                                            | 250 µl                                                                                                           | 50 µl                                                  | 50 µl                                            |
| <b>Recovery volume</b>                                                  | 20 ml                                                                                                            | 1.5 ml                                                 | 1.5 ml                                           |
| <b>Plates / Transformation</b>                                          | 6                                                                                                                | 2                                                      | 2                                                |
| <b>Cas9</b>                                                             | 5 µg – 15 µg                                                                                                     | 3 µg                                                   | 3 µg – 6 µg                                      |
| <b>sgRNA</b>                                                            | 8 – 12 µg                                                                                                        | 5.4 µg                                                 | 5.4 µg – 40 µg                                   |
| <b>Timepoint of transformation<br/>[hours after illumination start]</b> | +4                                                                                                               | +4                                                     | 0, +1, +2, +4, +6, +8,<br>+10, +12               |
| <b>Hygromycin [µg/ml]</b>                                               | 25                                                                                                               | 60                                                     | 60                                               |

**Table S2 Primers used in this study.**

| Primer    | Sequence (5' -> 3')                         |
|-----------|---------------------------------------------|
| CP_fw     | GTCACCTCGAATCACACAC                         |
| CP_fw2    | GAAGGAGTGAGATGACTTGGAC                      |
| CP_rv     | CTCCTCCACCTCTTCTGCTC                        |
| C5_fw     | TGGAGATCCAGGTCGGTTGC                        |
| C5_fw2    | TTGTAAAGTGAGGTCCAGAGGAGC                    |
| C3_rv     | CCAGGTTCTGTTGGTTGGC                         |
| C3_rv2    | TGCCGTGTCTACCAGAATGAGGTC                    |
| 5F_fw     | GCGAATTCCGCTTGAGGAACACATAC                  |
| 5F_rv     | GCTCTAGATTAGCCGAAGTCGGCGGACTG               |
| pBT_fw    | CTATGCTAGCCTTGCGCTATGACACTTC                |
| Aph7_fw   | ATGCGCTAGCATGACACAAGAATCCCTG                |
| Aph7_rv   | TCTAGATTATCAGGCGCCGGGGGCGG                  |
| rbse2_rv  | GCTCTAGACGCTTCAAATACGCCAG                   |
| 3F_fw     | TATAGCTAGCACCGCATCCGCGAGGG                  |
| 3F_rv     | CGTCTAGAGTGGTAGTTGGTGTACG                   |
| Cao_fw    | TGTTACCGCATAGAGCAGCC                        |
| Cao_rv    | CGCTACTCACCGCTGAGAAC                        |
| sg_CP_fw1 | CGATCTTCAGAGCAGTGCGGGTTTTAGAGCTAGAAATAGCAAG |
| T7_CP_fw1 | TAATACGACTCACTATAGCGATCTTCAGAGCAGTGCG       |
| sg_CP_fw2 | GATCGCGTACAAGTACGGCAGTTTTAGAGCTAGAAATAGCAAG |
| T7_CP_fw2 | TAATACGACTCACTATAGGATCGCGTACAAGTACGGCA      |
| Cas9_rv   | AAAAAAAGCACCGACTCGGTGCCAC                   |
